# Supplementary material
Source: PubMed Central journal article supplement (PMC3756538)
Supplement: NIHMS493300-supplement-1.pdf [file NIHMS493300-supplement-1.pdf]

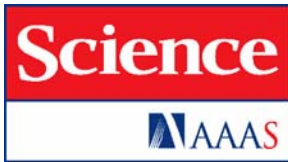

## Supplementary Materials for

### ***Drosophila* H1 Regulates the Genetic Activity of Heterochromatin by Recruitment of Su(var)3-9**

Xingwu Lu, Sandeep N. Wontakal, Harsh Kavi, Byung Ju Kim, Paloma M. Guzzardo, Alexander V. Emelyanov, Na Xu, Gregory J. Hannon, Jiri Zavadil, Dmitry V. Fyodorov,\* Arthur I. Skoultchi\*

\*To whom correspondence should be addressed. E-mail: dmitry.fyodorov@einstein.yu.edu (D.V.F.); arthur.skoultchi@einstein.yu.edu (A.I.S.)

Published 5 April 2013, *Science* **340**, 78 (2013)  
DOI: 10.1126/science.1234654

#### **This PDF file includes**

Materials and Methods  
Figs. S1 to S3  
Tables S1 to S3  
Full References

## **Materials and Methods**

### **Fly strains, genetics and RNAi**

Fly strains for H1 knockdown, rearing conditions and dissection techniques are described (4). *UAS:Su(var)3-9-eGFP* and *Su(var)3-9[6]* strains were generous gifts of Gunter Reuter and Sarah Elgin, respectively. Other strains were obtained from the Bloomington Stock Center. For RNAi in cell culture, 500-600 bp fragments of GFP (control) and *Drosophila* H1 coding sequences with T7 promoter overhangs were generated by PCR as described (26). Primer sequences are available upon request. dsRNA was generated using Ribomax T7 (Promega) and quantitated by spectrophotometry.  $5 \cdot 10^5$  *Drosophila* Kc cells were incubated with 20  $\mu$ g dsRNA on days 0, 2 and 4 for 1 hr in 1 ml serum-free Schneider medium (Invitrogen), followed by addition of 1 ml Schneider medium containing 20% heat-inactivated FBS. Protein content was examined by semi-quantitative Western blot on days 0-8 (4).

### **Microarray Expression Profiling**

RNA expression profiling of the duplicate (Kc) and triplicate (salivary glands) experimental sample groups was performed using Affymetrix Genechip system. Total RNA was extracted using the Trizol reagent (Invitrogen). RNA quality and quantity were determined using Agilent 2100 Bioanalyzer and Nanodrop ND-1000. 100 ng total RNA was used to prepare cRNA by following the Affymetrix 3'IVT Express Kit labeling protocol. Standard array processing procedures including hybridization, fluidics processing and scanning of the Affymetrix *Drosophila* 2.0 arrays were performed at the AECOM Microarray Facility.

### **Microarray Data Analysis Methods**

The RNA expression profiling data were processed and analyzed using the GeneSpring GX11 software (Agilent Technologies). Briefly, the raw data (.cel) files were normalized at the probe level by Robust Multichip Average algorithm (RMA) (27), and the significant differential abundance between

RNAi and corresponding control conditions was performed using T-test statistics ( $p < 0.05$ , alpha level) and varying fold-change thresholding (ranging from 25-100% of reproducible change, based on the target modulation stringency). The functional annotations of the resulting gene lists were performed using the NIH web-based tool DAVID (28).

### **Immunohistochemistry, northern blot, quantitative real-time RT-PCR and chromatin immunoprecipitation (qChIP)**

Indirect immunofluorescence (IF) analyses of polytene chromosomes, real-time RT-PCR and qChIP were carried out as described (4). Primer sequences are available upon request. The following additional antibodies were used for IF and ChIP: rabbit polyclonal anti-GFP (1:100, BD Bioscience), mouse monoclonal anti-dimethyl histone H3 (H3K9me2, Abcam), rabbit polyclonal anti-GAL4, CHIP grade (Abcam) and rabbit polyclonal anti-6X His tag antibody, CHIP grade (Abcam). Rabbit polyclonal anti-HA (Y-11, Santa Cruz) and mouse monoclonal anti-HA (F-7, Santa Cruz) were used as antibody isotype controls for ChIPs. For northern blot, total RNA was enriched for small RNA by sequential precipitation with increasing amount of ethanol (mirVana kit, Ambion). ~2  $\mu$ g RNA was loaded on a 15% TBE-urea gel, electrophoresed and transferred to a positively charged nylon membrane (Schleicher and Schuell). Radioactive ( $^{32}$ P) probes were prepared from PCR templates by random-primed labeling. PCR primer sequences are available upon request. The membranes were hybridized with probes overnight at 30°C, washed thrice at RT and exposed to film.

### **Small RNA library preparation and analyses**

Small RNA libraries were generated as described (29) with several modifications. In brief, 5  $\mu$ g total RNA was separated on a polyacrylamide gel, and 18–29 nt small RNAs were isolated for cloning. The RNA was eluted from the gel by electroelution using D-tube Dialyzers (Millipore) (30). Libraries were single-end sequenced on an Illumina Genome Analyzer for 36 cycles. After FASTQ to FASTA

conversion, the cloning adapter was trimmed from the 3'-end of each read, and sequences shorter than 15 nt or non-clipped sequences were discarded. The remaining sequences were collapsed into a non-redundant list and mapped to the *D. melanogaster* genome (release Apr. 2006 [BDGP R5/dm3]) to determine the total number of uniquely mapping reads. Up to two mismatches were allowed. Subsequently, all reads were mapped to the *Drosophila* transposon consensus sequences allowing up to three mismatches. All mappings were done using the short read aligner bowtie (31). The read count of mapping sequences was normalized to the total number of reads that mapped to the genome and were transformed to reads per million genomic mappers.

### **Reconstitution of chromatin, HMT assays and *in vitro* qChIP**

Oligonucleosomal substrates were reconstituted *in vitro* from supercoiled plasmid DNA (3.2 kb, pGIE-0), native core histones and H1 prepared from *Drosophila* embryos. Core histone to DNA and H1 to nucleosome ratios were titrated in pilot ATP-dependent chromatin assembly reactions (32) to achieve ~160 bp nucleosome repeat length (NRL) in H1-free chromatin and ~200 bp NRL in H1-containing chromatin. Oligonucleosomal templates were then reconstituted by gradient salt dialysis based on calculated component ratios in the presence of 0.1 mg/ml BSA. Recombinant Su(var)3-9-His<sub>6</sub> was expressed in *E. coli* BL21(DE3)pLys from pET15b-Su(var)3-9 construct generously provided by Axel Imhof (33) and purified on Talon (Clontech) resin. HMT reactions contained 50 nM Su(var)3-9-His<sub>6</sub>, 20 nM plasmid DNA (in chromatin-containing reactions only), 800 nM of each individual core histone (in H1- reactions) or 640 nM core histones and ~320 nM H1 (in H1+ reactions), 2 µg/ml BSA and 2.5 µM S-[Methyl-<sup>3</sup>H]-Adenosyl-L-methionine (<sup>3</sup>H-SAM, 80.7 Ci/mmol, Perkin Elmer) in 50 µl reaction buffer (50 mM Tris-HCl, pH 8.8, 5 mM MgCl<sub>2</sub>, 4 mM dithiothreitol). The reaction mixtures were incubated for 60 min at 27°C, loaded on SDS-PAGE and stained with Coomassie or transferred to PVDF for autoradiography. For *in vitro* qChIP, 10% of the reaction volume was diluted to 200 µl with RIPA buffer with 1% formaldehyde, followed by the qChIP protocol described above. In control *in vitro*

ChIP experiments, Su(var)3-9-His<sub>6</sub> was replaced with equimolar amounts of purified recombinant GAL4-VP16 (a generous gift of Jim Kadonaga and Mai Khuong) (34) or MBP-TRR(2199-2410)-His<sub>6</sub> (a generous gift of Thomas Kusch) (35).

### **Protein interactions assays**

UAS-driven GST fusion constructs for HP1, Su(var)3-9 and PtC (25) were prepared by cloning appropriate PCR products into pUAST plasmid; cloning details and primer sequences are available upon request. *Drosophila* S2 cells were co-transfected with a pAc-GAL4 driver construct (a generous gift of Thomas Kornberg) and indicated pUAST-GST constructs using Effectene reagent (Qiagen) and cultured in Schneider medium (Invitrogen) for 48 hr. Typically,  $5 \cdot 10^6$  cells were transfected with 1  $\mu$ g DNA in 60 mm dishes. They were lysed with a protease-inhibitor cocktail (Invitrogen), and nuclear extracts were prepared according to the instruction of Nuclear Complex Co-IP Kit (Active Motif). To precipitate the complexes, supernatants were incubated for 4 hr with glutathione Sepharose 4B gel (Pharmacia Biotech), the beads were washed five times with RIPA buffer, boiled in SDS-PAGE loading buffer, and precipitated material was analyzed by Western blot (1). Alternatively, the lysates were immunoprecipitated with anti-H1 antibody (4) as described (25). Rabbit anti-H1 (1:50,000) or mouse anti-GST antibodies (1:1,000, Santa Cruz Biotechnology) were used for Western. Full-length Su(var)3-9 was translated *in vitro* from pET15b-Su(var)3-9 in TnT T7 Reticulocyte Lysate System (Promega) in the presence of 20  $\mu$ Ci of EasyTag <sup>35</sup>S-L-methionine (>1,000 Ci/mmol, Perkin Elmer). GST fusions of H1, H2A and HP1 were expressed in *E.coli* BL21(DE3)pLys from constructs prepared in pGEX 4T-1 (GE Life Sciences). Primer sequences and cloning details are available upon request. Bacterial lysates were incubated with <sup>35</sup>S-labeled Su(var)3-9 or purified Su(var)3-9-His<sub>6</sub> expressed in *E.coli*, and GST fusions were purified on glutathione Sepharose as described above. The purified proteins were analyzed by SDS-PAGE, Coomassie staining and autoradiography or anti-6His Western blot.

**Fig. S1. Comparative genome-wide analyses of transcripts in H1-depleted *Drosophila* Kc cells and salivary glands.** (A) Western blot analysis of H1 knockdown in *Drosophila* Kc cells. H1 protein was depleted by RNAi in cultured cells as described in *Methods*. H1 protein levels were examined by semi-quantitative Western (I) at days 0, 2, 4, 6 and 8 of RNAi treatment (green). Tubulin Western (red) was used as loading control. Relative H1 expression levels (%) are shown at the bottom and are normalized to protein loading and control Kc cells (RNAi of unrelated protein, GFP). (B) Genome-wide analysis of transcripts in H1-depleted Kc cells. Transcript expression was examined by microarray analyses in H1-depleted (~31% control level) and control (GFP RNAi) Kc cells. The graphs plot signal intensities for transcripts in control (X-axis) versus H1-depleted (Y axis) samples and are the average of two independent experiments. Standard normalization procedures were applied to the raw data. The diagonal lines with a slope of 1 indicate equal expression levels and two threshold activation/repression levels (1.25-fold change). Significantly affected transcripts above or below the threshold (1.25-fold) are indicated by dots. Left panel, signals for protein-coding gene probes. Right panel, signals for probes annotated as TE probes. Numbers in the top left and bottom right corners of each panel represent percentages of transcripts that are up- or down-regulated above the threshold, relative to the total number of probes (18,833 protein coding genes, 79 TEs). (C) Genome-wide analysis of transcripts in H1-depleted salivary glands. The numerical data originally presented in **Fig. 1A** was re-analyzed with fold-activation threshold set to 1.25, as in (B) above, for direct comparison.

**Fig. S2. *Drosophila* H1 represses transposable elements *in vivo*, and the repression is partially reversed by ectopic overexpression of Su(var)3-9.** (A) Activation of TEs by H1 depletion in larvae. Transcripts were examined in H1-depleted (~5% wild-type protein level) and control (*Nau* RNAi) animals as in **Fig. 1B**, but RNA samples were prepared from L3 larvae, rather than from salivary glands (SGs). Fold changes were calculated as a ratio of signals for H1-depleted samples to those for control samples. Values were normalized to the expression of RP49 and are representative of three independent experiments. Standard deviations are shown as error bars. *yellow* and *tubulin* (*Tub*) were used as controls. (B) Activation of TEs by H1 depletion in larval ovaries. The experiments similar to those in (A) were performed on ovaries dissected from L3 larvae. (C) ChIP analyses of dimethyl-H3K9 occupancy at TE regulatory regions in *Su(var)3-9* larvae. The presence of the repressive histone mark (H3K9Me<sub>2</sub>) in *copia*, *gypsy*, *ZAM*, *Eu Ste*, *Het Ste*, *yellow* and *Tub*, was measured by quantitative ChIP in control (gray bars) and homozygous *Su(var)3-9[6]* (black bars) whole larvae. The ordinate indicates the amounts of specific PCR products in ChIP DNA samples relative to input DNA. All ChIP experiments were performed in triplicate. Error bars, standard deviation. (D) ChIP analyses of H1 occupancy at TE regulatory regions in *Su(var)3-9* larvae. H1 presence in the same TE and control loci as in (C) was measured by quantitative ChIP in control (gray bars) and homozygous *Su(var)3-9[6]* (black bars) larvae. (E) Distribution of dimethyl-H3K9 and H1 in SG polytene chromosomes of *Su(var)3-9* larvae. SGs from wild-type (WT) and homozygous *Su(var)3-9[6]* larvae were prepared as in (**Fig. 2E**), and polytene spreads were stained with DAPI and antibodies against H3K9Me<sub>2</sub> and H1. *Su(var)3-9* mutation strongly reduces the H3K9Me<sub>2</sub> mark but does not affect polytene chromosome structure or H1 distribution. (F) Re-repression of transposable elements upon ectopic over-expression of *Su(var)3-9* in H1-depleted whole larvae. Total RNA was prepared from control, H1-depleted and H1-depleted, *Su(var)3-9*-“rescued” (overexpressing UAS:*Su(var)3-9*-eGFP under the control of Tubulin-GAL4) whole L3 larvae. Real-time RT-PCR assays were performed and analyzed as in (A). Black bars, H1-depleted salivary glands; gray bars, H1-depleted, *Su(var)3-9*-rescued salivary glands.

**Fig. S3. Su(var)3-9 is tethered to H1-containing chromatin.** (A) Recombinant Su(var)3-9, GAL4-VP16 and MBP-TRR fragment. 6His-tagged Su(var)3-9 was expressed and purified from bacteria and analyzed by SDS-PAGE and Coomassie staining. Purified recombinant GAL4-VP16 and MBP-TRR(2199-2410)-His<sub>6</sub> were the gifts of Jim Kadonaga, Mai Khuong and Thomas Kusch. Open arrowhead, Su(var)3-9-His<sub>6</sub>, GAL4-VP16 or MBP-TRR-His<sub>6</sub> band; molecular mass markers (kDa) are shown on the left. (B) Protein composition of *in vitro* reconstituted chromatin. Oligonucleosomes prepared by salt-dialysis from plasmid DNA and core histones with (H1+) or without H1 (H1-) were analyzed by SDS-PAGE and Coomassie staining. Positions of BSA, H1 and core histone bands are indicated on the right; molecular mass markers (kDa) are shown on the left. (C) Micrococcal nuclease (MNase) analysis of reconstituted chromatin. Partial digestion with 4 different dilutions of MNase was performed on H1-free (H1-) and H1-containing (H1+) oligonucleosomes. De-proteinated DNA fragments were analyzed by agarose gel electrophoresis and stained with ethidium. Note the increased nucleosome repeat length in H1+ lanes consistent with H1 incorporation. Triangles at the top indicate increasing MNase concentrations; 123 bp ladder was used as a molecular mass marker.



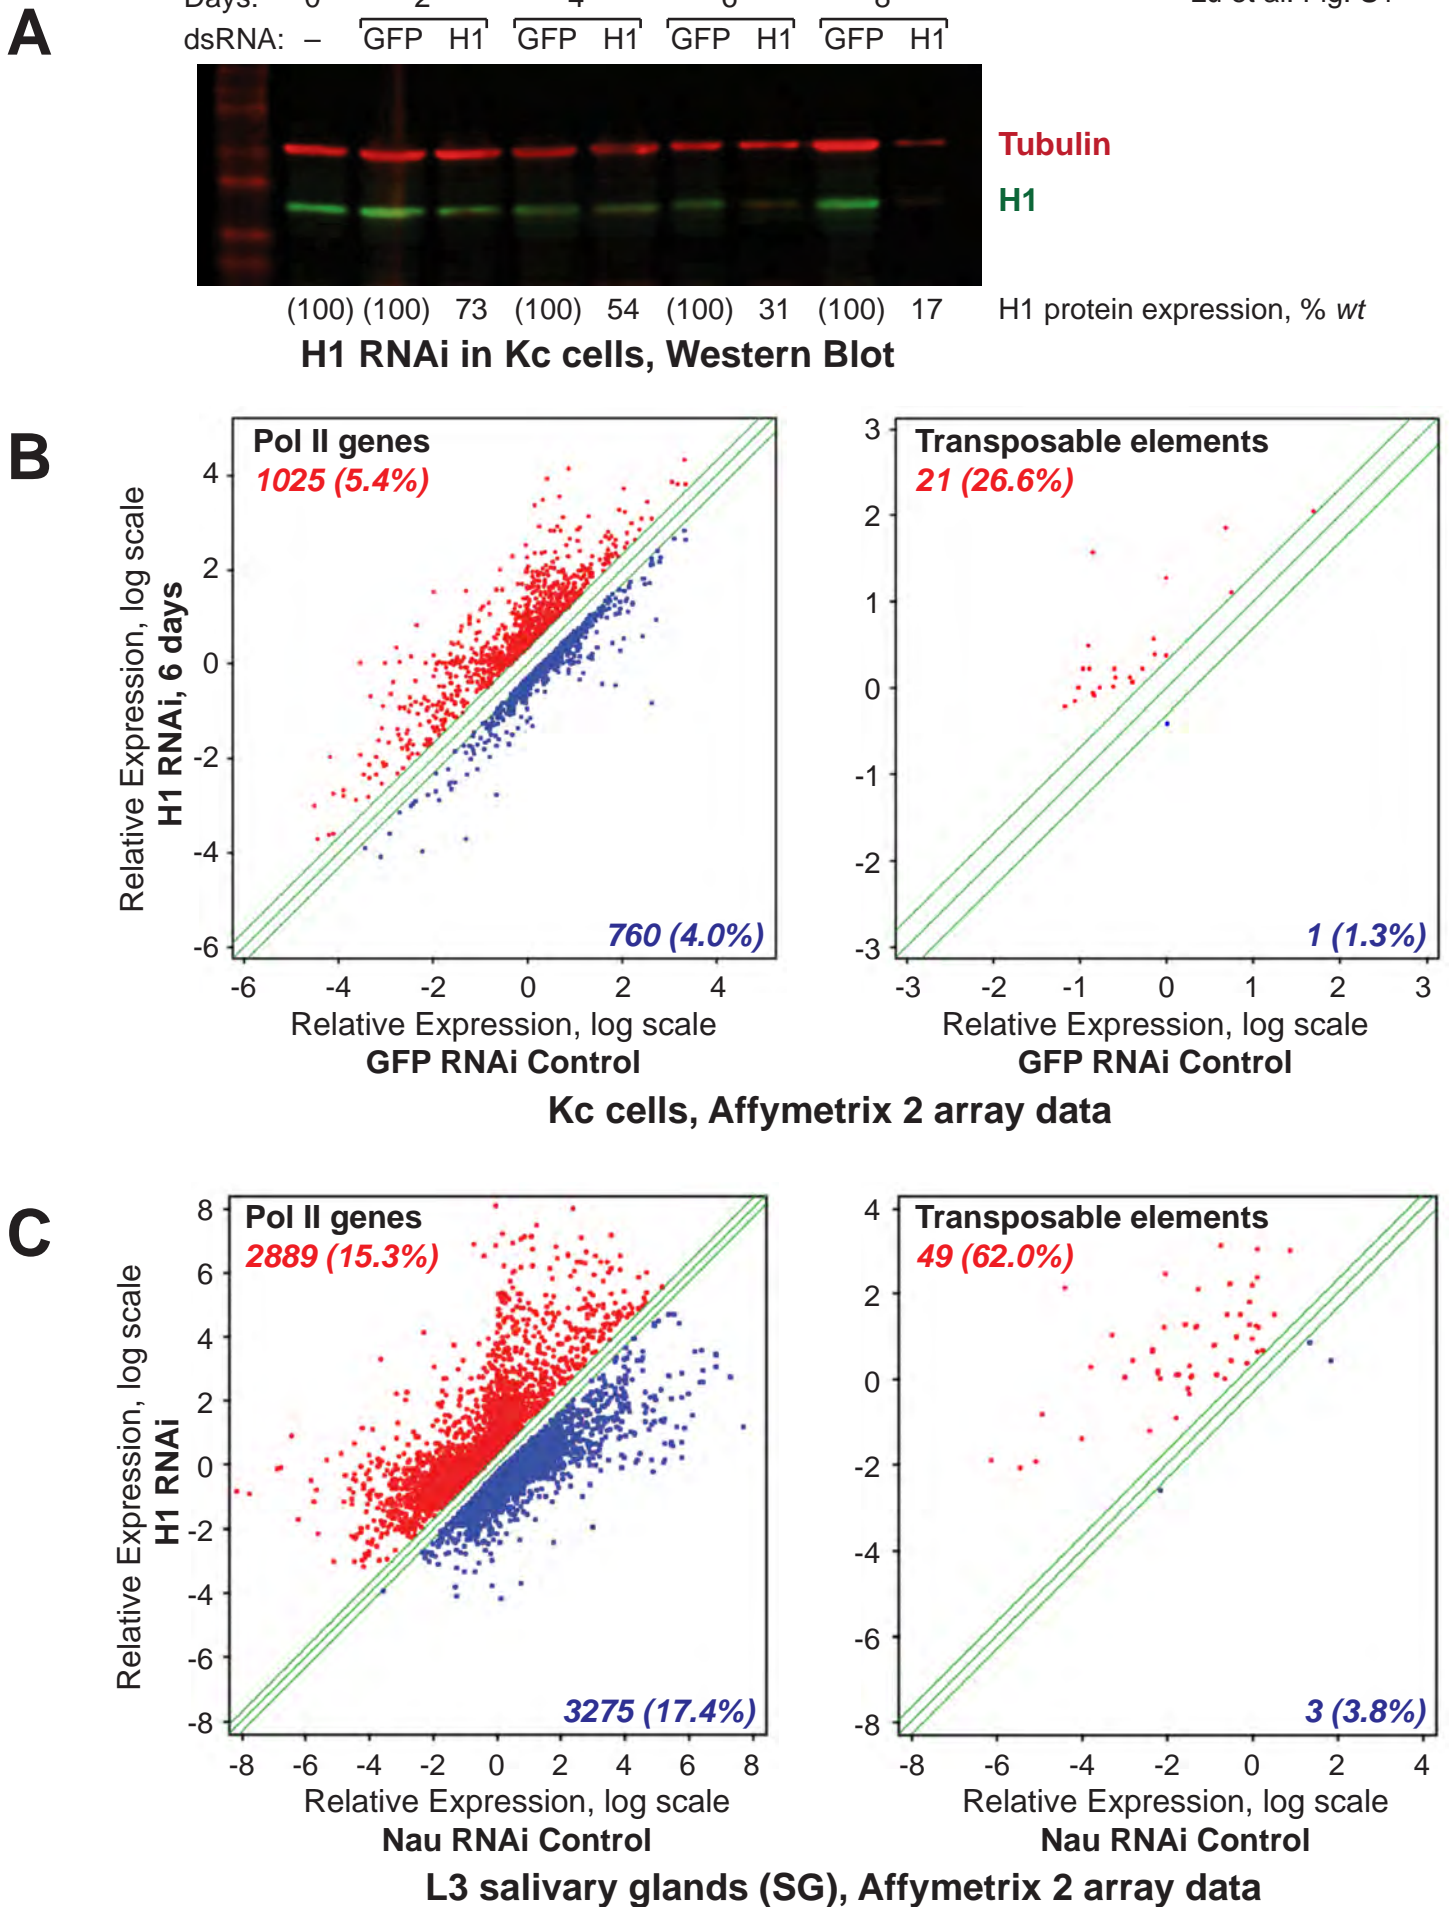

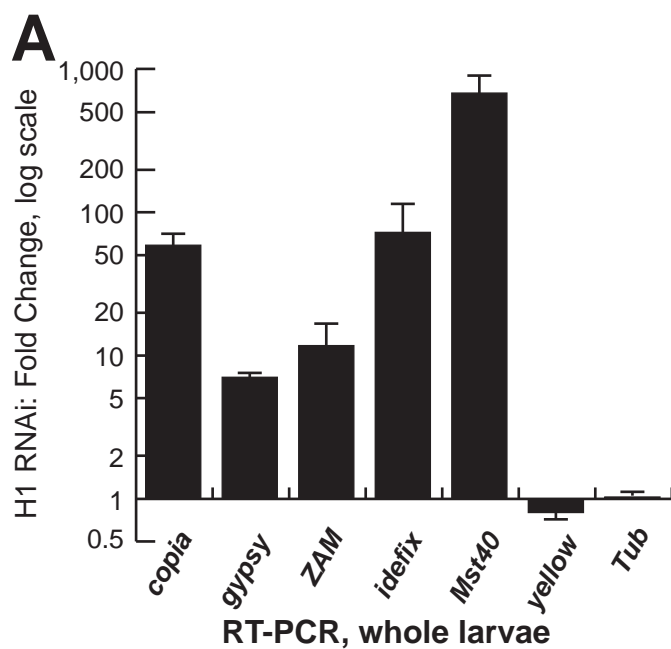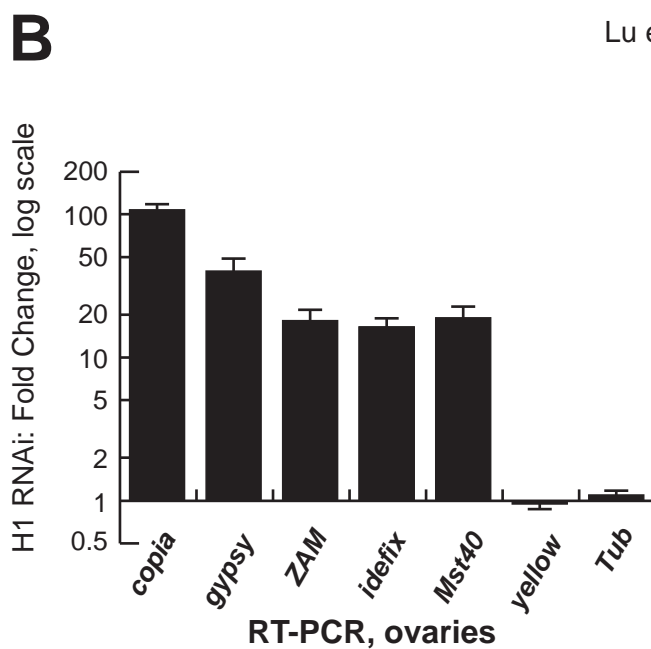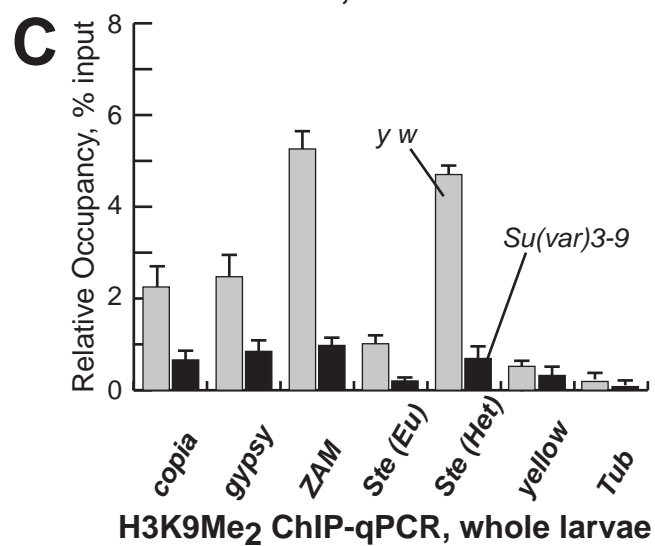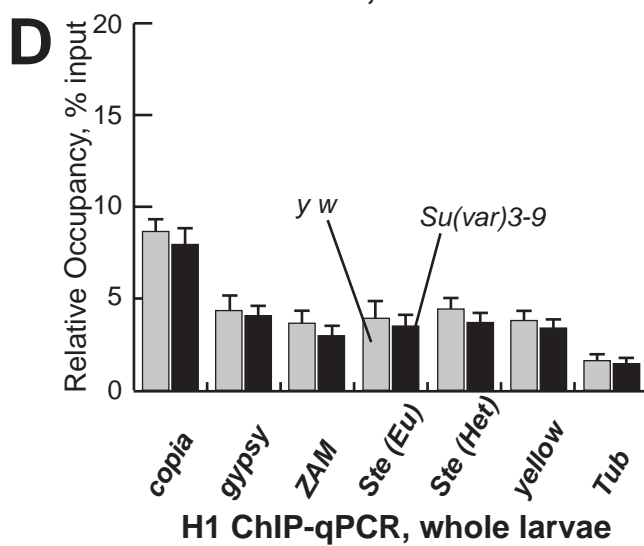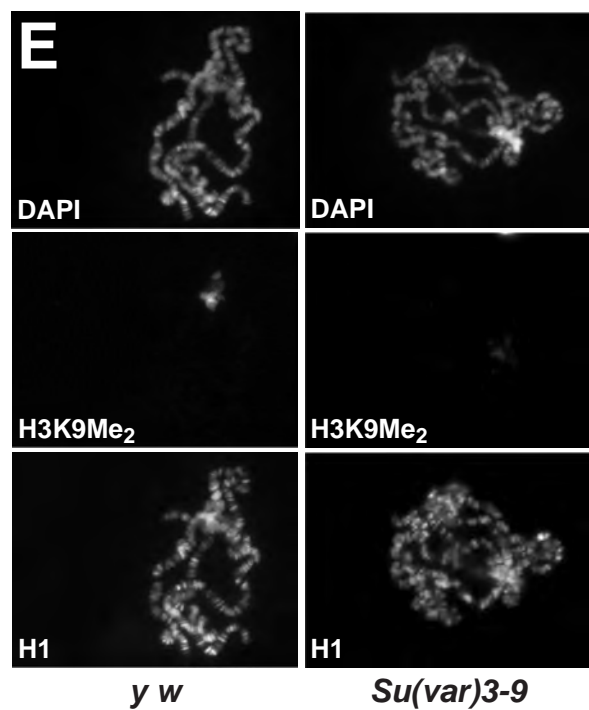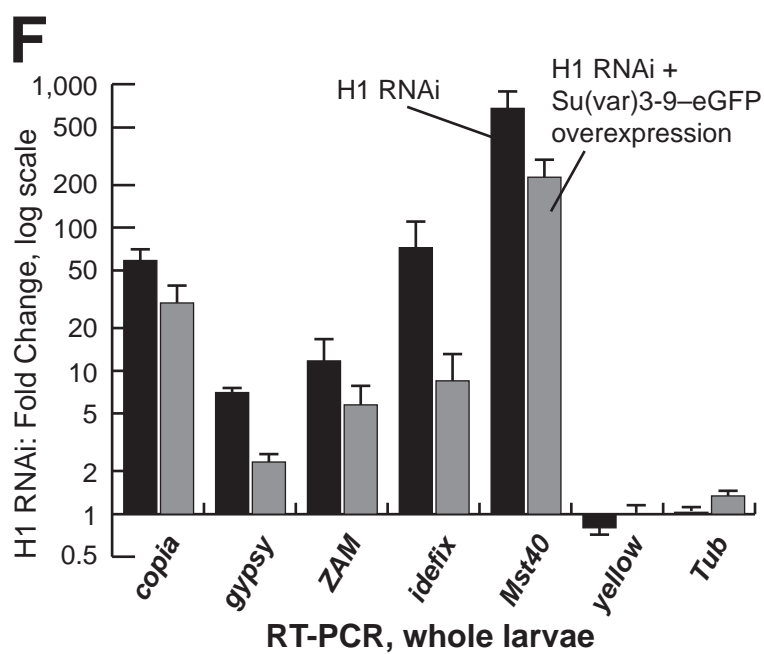

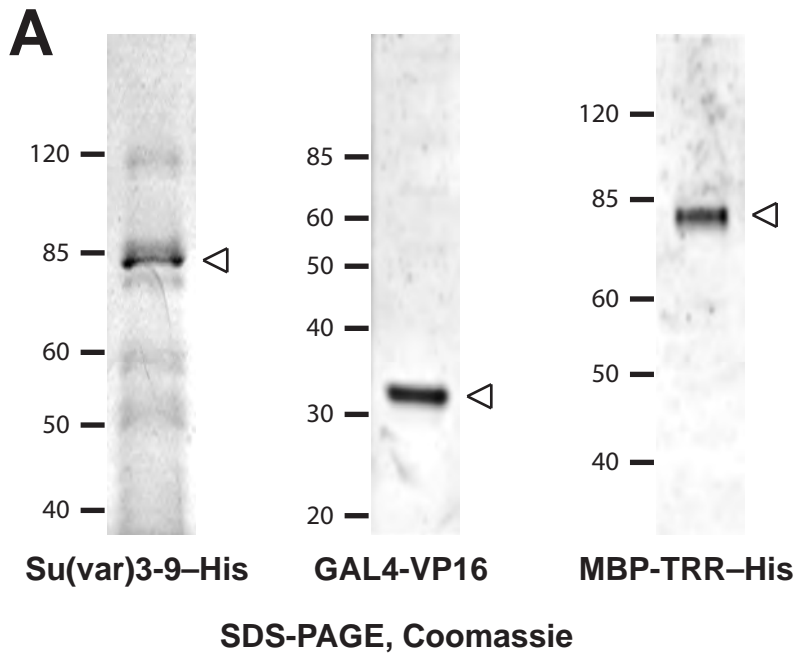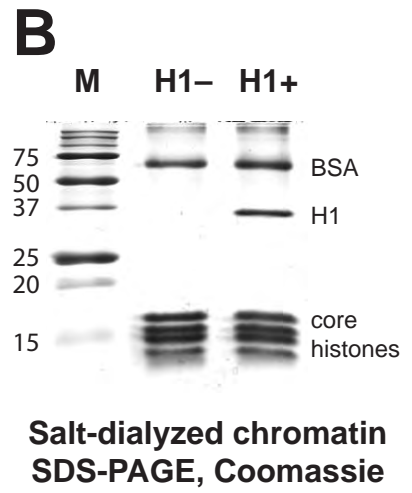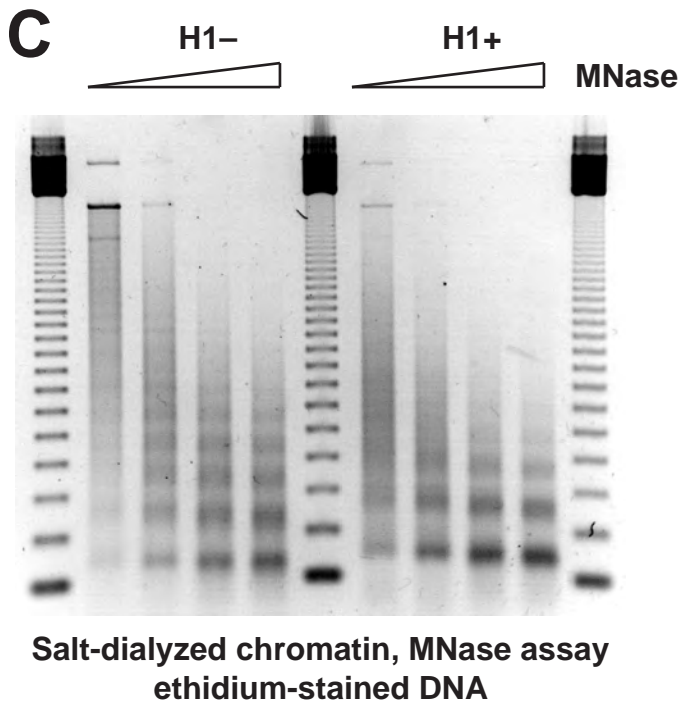

**Table S1. Regulation of transposable element activity by H1 knock-down in *Drosophila in vivo* (L3 salivary glands, SG) and Kc cells (Kc).**

RNA expression profiling of the duplicate (Kc) and triplicate (SG) experimental sample groups was performed using Affymetrix Genechip system as described in Methods. Both *in vivo* and in cultured cells, H1 depletion activates an overlapping set of transcripts annotated as transposable elements. Samples with >1.25 fold change are highlighted in orange, and samples with >2.0 fold change in expression are highlighted in red. *P*-values of differential abundance between RNAi and corresponding control conditions were calculated by T-statistics, and data with *p*-values >0.05 were excluded from consideration (highlighted in red).

| Probe Set ID | Name         | Avg SG H1 RNAi vs Nau RNAi | <i>p</i> -value | Avg Kc H1 RNAi vs GFP RNAi | <i>p</i> -value |
|--------------|--------------|----------------------------|-----------------|----------------------------|-----------------|
| 1625791_s_at | invader4     | 89.60                      | 0.00015         | 2.25                       | 0.01716         |
| 1639729_s_at | blastopia    | 20.40                      | 0.00000         | 1.53                       | 0.00477         |
| 1623960_s_at | GATE         | 19.81                      | 0.00043         | 2.24                       | 0.00050         |
| 1640448_x_at | ZAM          | 17.17                      | 0.00204         | 1.23                       | 0.01175         |
| 1630934_at   | R2-element   | 17.04                      | 0.00149         | 1.42                       | 0.09126         |
| 1636749_at   | Bari2        | 14.98                      | 0.00001         | 1.09                       | 0.57824         |
| 1627936_s_at | invader3     | 9.65                       | 0.00006         | 2.02                       | 0.01013         |
| 1634666_at   | ZAM          | 9.02                       | 0.00388         | 1.27                       | 0.00557         |
| 1635258_s_at | Quasimodo    | 8.55                       | 0.00113         | 1.19                       | 0.00350         |
| 1641450_s_at | micropia     | 8.50                       | 0.00387         | 1.58                       | 0.07927         |
| 1631349_s_at | Tabor        | 7.67                       | 0.00158         | 1.20                       | 0.05180         |
| 1624819_s_at | gypsy        | 7.65                       | 0.00077         | 1.45                       | 0.07845         |
| 1626392_s_at | 17.6         | 7.40                       | 0.00000         | 1.43                       | 0.00139         |
| 1626966_s_at | Juan         | 7.18                       | 0.00011         | 0.89                       | 0.24245         |
| 1635696_s_at | McClintock   | 6.66                       | 0.00018         | 1.12                       | 0.39400         |
| 1634633_s_at | accord       | 6.58                       | 0.00001         | 2.13                       | 0.00006         |
| 1626205_s_at | G6           | 6.07                       | 0.00077         | 0.87                       | 0.09237         |
| 1629641_s_at | lvk          | 5.64                       | 0.01073         | 1.63                       | 0.00663         |
| 1633959_s_at | Burdock      | 5.34                       | 0.00017         | 0.86                       | 0.05810         |
| 1635829_s_at | gypsy2       | 5.12                       | 0.00166         | 1.70                       | 0.00115         |
| 1635017_at   | gypsy6       | 5.10                       | 0.00495         | 5.22                       | 0.00263         |
| 1638469_s_at | opus         | 4.75                       | 0.00145         | 1.09                       | 0.14097         |
| 1624377_s_at | rover        | 4.64                       | 0.00219         | 1.08                       | 0.07366         |
| 1630948_s_at | Doc3-element | 4.55                       | 0.00000         | 1.24                       | 0.05100         |
| 1640955_s_at | Tirant       | 4.31                       | 0.00011         | 0.93                       | 0.35628         |
| 1641210_s_at | qbert        | 3.57                       | 0.00050         | 2.60                       | 0.00776         |
| 1632295_s_at | Doc2-element | 3.36                       | 0.00139         | 1.76                       | 0.00411         |
| 1632924_at   | Tom1         | 3.31                       | 0.00608         | 1.21                       | 0.11064         |
| 1635886_s_at | blood        | 3.28                       | 0.00028         | 0.93                       | 0.03711         |
| 1623158_s_at | Tom1         | 3.20                       | 0.00256         | 1.30                       | 0.05554         |
| 1633998_s_at | HMS-Beagle   | 3.03                       | 0.01122         | 1.71                       | 0.01677         |
| 1634187_x_at | Dm88         | 3.00                       | 0.00853         | 1.29                       | 0.07544         |
| 1640606_x_at | Cr1a         | 2.95                       | 0.00125         | 1.61                       | 0.00831         |
| 1637622_s_at | Bari1        | 2.77                       | 0.00032         | 1.19                       | 0.04960         |
| 1632683_s_at | copia        | 2.57                       | 0.00003         | 1.09                       | 0.04989         |
| 1632902_s_at | G3           | 2.46                       | 0.00032         | 1.54                       | 0.08629         |
| 1626453_x_at | G4           | 2.34                       | 0.00050         | 0.90                       | 0.18014         |
| 1640167_s_at | 412          | 2.23                       | 0.00186         | 1.09                       | 0.00517         |
| 1641421_s_at | diver2       | 2.19                       | 0.05984         | 2.40                       | 0.01007         |

|              |                |      |         |      |         |
|--------------|----------------|------|---------|------|---------|
| 1639054_s_at | pogo           | 2.16 | 0.00094 | 1.86 | 0.03760 |
| 1626434_s_at | gypsy5         | 2.10 | 0.00064 | 1.21 | 0.00916 |
| 1623159_at   | looper1        | 2.02 | 0.00162 | 1.02 | 0.89600 |
| 1624543_s_at | springer       | 1.95 | 0.00494 | 1.81 | 0.10221 |
| 1624631_x_at | Rt1a           | 1.92 | 0.00012 | 1.14 | 0.11196 |
| 1625050_s_at | 1731           | 1.83 | 0.00160 | 1.02 | 0.67469 |
| 1640242_s_at | Transpac       | 1.83 | 0.00588 | 1.91 | 0.01940 |
| 1630420_x_at | baggins        | 1.75 | 0.01979 | 1.13 | 0.24281 |
| 1630262_s_at | transib1       | 1.66 | 0.01159 | 1.36 | 0.01537 |
| 1625195_s_at | mdg1           | 1.62 | 0.09036 | 1.28 | 0.01754 |
| 1630585_s_at | HeT-A          | 1.45 | 0.22827 | 1.38 | 0.10788 |
| 1634508_at   | INE1           | 1.43 | 0.02611 | 1.00 | 0.96696 |
| 1624224_at   | HeT-A          | 1.41 | 0.04022 | 1.05 | 0.63617 |
| 1628082_at   | aurora-element | 1.37 | 0.15253 | 0.74 | 0.02667 |
| 1627940_at   | Stalker3       | 1.36 | 0.05480 | 1.11 | 0.37582 |
| 1637786_s_at | R1-element     | 1.32 | 0.07871 | 1.24 | 0.00895 |
| 1631895_s_at | gypsy3         | 1.31 | 0.09286 | 0.86 | 0.08256 |
| 1637377_x_at | mariner2       | 1.21 | 0.77749 | 1.04 | 0.21701 |
| 1631713_x_at | S-element      | 1.20 | 0.06602 | 1.15 | 0.22047 |
| 1627374_at   | transib3       | 1.20 | 0.37826 | 1.12 | 0.18493 |
| 1633970_at   | NOF            | 1.18 | 0.46404 | 1.12 | 0.16582 |
| 1635012_x_at | transib3       | 1.13 | 0.48394 | 1.04 | 0.59613 |
| 1627177_x_at | transib4       | 1.13 | 0.10484 | 1.02 | 0.79763 |
| 1638228_s_at | rooA           | 1.11 | 0.29276 | 1.11 | 0.24498 |
| 1634338_x_at | Rt1c           | 1.10 | 0.15896 | 0.81 | 0.23486 |
| 1623349_x_at | Rt1b           | 1.08 | 0.28389 | 1.43 | 0.01051 |
| 1636015_s_at | Stalker2       | 1.07 | 0.74723 | 1.29 | 0.00551 |
| 1626130_s_at | G-element      | 1.02 | 0.55548 | 0.99 | 0.91311 |
| 1626288_at   | Circe          | 1.02 | 0.34201 | 1.23 | 0.12265 |
| 1629669_x_at | 297            | 1.01 | 0.27657 | 0.77 | 0.12584 |
| 1641296_at   | S-element      | 0.97 | 0.48514 | 0.98 | 0.89069 |
| 1623845_s_at | invader5       | 0.96 | 0.71349 | 0.91 | 0.02330 |
| 1623559_s_at | I-element      | 0.94 | 0.89535 | 0.88 | 0.07895 |
| 1625649_s_at | frogger        | 0.87 | 0.08939 | 0.87 | 0.26529 |
| 1631791_at   | ?              | 0.82 | 0.02715 | 0.92 | 0.50934 |
| 1638428_at   | TART-element   | 0.78 | 0.01313 | 1.06 | 0.77709 |
| 1632126_at   | Penelope/ORF1  | 0.77 | 0.12380 | 0.90 | 0.34218 |
| 1637055_s_at | gtwin          | 0.73 | 0.00444 | 0.96 | 0.56529 |
| 1629242_x_at | TART-element   | 0.71 | 0.00362 | 1.05 | 0.48864 |
| 1628989_at   | P-element      | 0.40 | 0.00677 | 1.06 | 0.31559 |

**Table S2. H1 knockdown in *Drosophila in vivo* activates the expression of transposable element-related small RNAs.**

Small RNA expression in salivary glands and ovaries of control (Nau RNAi) and H1 knockdown (to ~5% control H1 protein level) larvae was analyzed by massive parallel sequencing as described in *Methods*. The read counts are presented as normalized reads per million genomic mappers. n.d., not detected in control or experimental samples.

| Name         | Salivary glands, small RNA reads (21-28 nt) |         |                | Ovaries, small RNA reads (21-28 nt) |          |              |
|--------------|---------------------------------------------|---------|----------------|-------------------------------------|----------|--------------|
|              | Nau RNAi                                    | H1 RNAi | Ratio H1/Nau   | Nau RNAi                            | H1 RNAi  | Ratio H1/Nau |
| invader4     | 1.756                                       | 154.580 | <b>88.043</b>  | 100.607                             | 255.346  | <b>2.538</b> |
| blastopia    | n.d.                                        | n.d.    | <b>n.d.</b>    | n.d.                                | n.d.     | <b>n.d.</b>  |
| GATE         | 5.518                                       | 46.992  | <b>8.516</b>   | 500.260                             | 1248.957 | <b>2.497</b> |
| ZAM          | 0.502                                       | 56.885  | <b>113.399</b> | 354.103                             | 893.264  | <b>2.523</b> |
| R2-element   | 0.251                                       | 8.656   | <b>34.513</b>  | 30.895                              | 67.196   | <b>2.175</b> |
| Bari2        | n.d.                                        | n.d.    | <b>n.d.</b>    | n.d.                                | n.d.     | <b>n.d.</b>  |
| invader3     | 0.752                                       | 15.458  | <b>20.543</b>  | 285.976                             | 653.149  | <b>2.284</b> |
| ZAM          | 0.502                                       | 56.885  | <b>113.399</b> | 354.103                             | 893.264  | <b>2.523</b> |
| Quasimodo    | 3.762                                       | 35.862  | <b>9.532</b>   | 432.925                             | 1052.743 | <b>2.432</b> |
| micropia     | 3.261                                       | 108.824 | <b>33.375</b>  | 214.284                             | 993.610  | <b>4.637</b> |
| Tabor        | 1.003                                       | 4.328   | <b>4.314</b>   | 631.366                             | 904.015  | <b>1.432</b> |
| gypsy        | 3.762                                       | 167.564 | <b>44.538</b>  | 268.548                             | 1404.852 | <b>5.231</b> |
| 17.6         | 3.511                                       | 19.168  | <b>5.459</b>   | 471.742                             | 1532.973 | <b>3.250</b> |
| Juan         | 2.007                                       | 46.992  | <b>23.419</b>  | 150.514                             | 752.599  | <b>5.000</b> |
| McClintock   | 0.502                                       | 2.473   | <b>4.930</b>   | 133.878                             | 335.086  | <b>2.503</b> |
| accord       | 1.756                                       | 217.030 | <b>123.612</b> | 208.343                             | 751.704  | <b>3.608</b> |
| G6           | 2.007                                       | 3.710   | <b>1.849</b>   | 428.964                             | 602.975  | <b>1.406</b> |
| Ivk          | 3.261                                       | 30.298  | <b>9.292</b>   | 312.514                             | 744.536  | <b>2.382</b> |
| Burdock      | 2.007                                       | 26.588  | <b>13.250</b>  | 115.658                             | 350.317  | <b>3.029</b> |
| gypsy2       | 1.505                                       | 6.802   | <b>4.520</b>   | 619.087                             | 1739.042 | <b>2.809</b> |
| gypsy6       | 8.779                                       | 22.259  | <b>2.536</b>   | 1419.978                            | 2174.475 | <b>1.531</b> |
| opus         | 7.775                                       | 113.152 | <b>14.553</b>  | 472.534                             | 1327.801 | <b>2.810</b> |
| rover        | 2.007                                       | 4.328   | <b>2.157</b>   | 819.112                             | 1182.656 | <b>1.444</b> |
| Doc3-element | 1.003                                       | 28.443  | <b>28.350</b>  | 217.057                             | 650.461  | <b>2.997</b> |
| Tirant       | 0.251                                       | 1.237   | <b>4.930</b>   | 274.886                             | 34.046   | <b>0.124</b> |
| qbert        | n.d.                                        | n.d.    | <b>n.d.</b>    | n.d.                                | n.d.     | <b>n.d.</b>  |
| Doc2-element | 1.003                                       | 6.802   | <b>6.779</b>   | 225.771                             | 700.634  | <b>3.103</b> |
| Tom1         | n.d.                                        | n.d.    | <b>n.d.</b>    | 0.792                               | 4.480    | <b>5.655</b> |
| blood        | 28.092                                      | 310.396 | <b>11.049</b>  | 570.764                             | 2118.926 | <b>3.712</b> |
| Tom1         | n.d.                                        | n.d.    | <b>n.d.</b>    | 0.792                               | 4.480    | <b>5.655</b> |
| HMS-Beagle   | 1.756                                       | 11.130  | <b>6.339</b>   | 313.306                             | 808.149  | <b>2.579</b> |
| Dm88         | 1.756                                       | 22.259  | <b>12.678</b>  | 233.692                             | 737.368  | <b>3.155</b> |
| Cr1a         | 9.280                                       | 161.999 | <b>17.456</b>  | 421.835                             | 1262.396 | <b>2.993</b> |
| Bari1        | 0.502                                       | 3.092   | <b>6.163</b>   | 91.497                              | 305.520  | <b>3.339</b> |
| copia        | 24.580                                      | 348.113 | <b>14.162</b>  | 329.942                             | 768.727  | <b>2.330</b> |
| G3           | 1.254                                       | 12.985  | <b>10.354</b>  | 5.149                               | 15.231   | <b>2.958</b> |
| G4           | 0.502                                       | 6.801   | <b>13.559</b>  | 70.504                              | 206.069  | <b>2.923</b> |
| 412          | 10.785                                      | 32.771  | <b>3.038</b>   | 1230.252                            | 3779.125 | <b>3.072</b> |
| diver2       | 2.508                                       | 6.801   | <b>2.712</b>   | 200.817                             | 437.224  | <b>2.177</b> |
| pogo         | 35.115                                      | 1.855   | <b>0.053</b>   | 220.621                             | 387.051  | <b>1.754</b> |
| gypsy5       | 0.251                                       | 0.618   | <b>2.465</b>   | 274.886                             | 956.876  | <b>3.481</b> |

|                |         |         |               |          |          |              |
|----------------|---------|---------|---------------|----------|----------|--------------|
| looper1        | 0.251   | 1.855   | <b>7.396</b>  | 21.389   | 43.006   | <b>2.011</b> |
| springer       | 100.077 | 149.015 | <b>1.489</b>  | 323.209  | 1147.714 | <b>3.551</b> |
| Rt1a           | 1.756   | 6.183   | <b>3.522</b>  | 175.071  | 371.820  | <b>2.124</b> |
| 1731           | 4.013   | 39.572  | <b>9.861</b>  | 223.394  | 565.346  | <b>2.531</b> |
| Transpac       | 4.013   | 21.641  | <b>5.393</b>  | 51.888   | 204.277  | <b>3.937</b> |
| baggins        | 3.010   | 30.298  | <b>10.066</b> | 314.495  | 784.854  | <b>2.496</b> |
| transib1       | 0.502   | 16.695  | <b>33.280</b> | 4.753    | 16.127   | <b>3.393</b> |
| mdg1           | 7.274   | 59.977  | <b>8.246</b>  | 1225.895 | 3192.276 | <b>2.604</b> |
| HeT-A          | 2.508   | 6.183   | <b>2.465</b>  | 245.179  | 430.057  | <b>1.754</b> |
| INE1           | 1.003   | 12.985  | <b>12.942</b> | n.d.     | n.d.     | <b>n.d.</b>  |
| HeT-A          | 2.508   | 6.183   | <b>2.465</b>  | 245.179  | 430.057  | <b>1.754</b> |
| aurora-element | 1.003   | 1.855   | <b>1.849</b>  | 74.465   | 198.005  | <b>2.659</b> |
| Stalker3       | 2.007   | 8.038   | <b>4.006</b>  | n.d.     | n.d.     | <b>n.d.</b>  |
| R1-element     | 16.554  | 51.320  | <b>3.100</b>  | n.d.     | n.d.     | <b>n.d.</b>  |
| gypsy3         | 2.007   | 3.092   | <b>1.541</b>  | 514.915  | 1333.176 | <b>2.589</b> |
| mariner2       | 0.000   | 1.855   | <b>INF</b>    | 1.584    | 0.896    | <b>0.565</b> |
| S-element      | 3.261   | 30.298  | <b>9.292</b>  | 44.362   | 130.809  | <b>2.949</b> |
| transib3       | n.d.    | n.d.    | <b>n.d.</b>   | 6.337    | 39.422   | <b>6.220</b> |
| NOF            | 0.251   | 0.000   | <b>0.000</b>  | 4.357    | 7.168    | <b>1.645</b> |
| transib3       | n.d.    | n.d.    | <b>n.d.</b>   | 6.337    | 39.422   | <b>6.220</b> |
| transib4       | 0.000   | 6.183   | <b>INF</b>    | 0.396    | 1.792    | <b>4.524</b> |
| rooA           | 3.010   | 32.771  | <b>10.888</b> | 242.406  | 711.386  | <b>2.935</b> |
| Rt1c           | 0.000   | 1.237   | <b>INF</b>    | 23.765   | 38.526   | <b>1.621</b> |
| Rt1b           | 6.772   | 39.572  | <b>5.843</b>  | 544.226  | 1014.217 | <b>1.864</b> |
| Stalker2       | 2.007   | 3.710   | <b>1.849</b>  | 558.881  | 1262.396 | <b>2.259</b> |
| G-element      | 4.264   | 6.802   | <b>1.595</b>  | 371.927  | 654.045  | <b>1.759</b> |
| Circe          | 3.261   | 45.137  | <b>13.843</b> | 275.282  | 682.715  | <b>2.480</b> |
| 297            | 10.033  | 304.213 | <b>30.322</b> | 578.290  | 2308.868 | <b>3.993</b> |
| S-element      | 3.261   | 30.298  | <b>9.292</b>  | 44.362   | 130.809  | <b>2.949</b> |
| invader5       | 1.756   | 10.511  | <b>5.987</b>  | 0.792    | 1.792    | <b>2.262</b> |
| I-element      | 1.254   | 19.168  | <b>15.284</b> | 267.360  | 716.761  | <b>2.681</b> |
| frogger        | 0.000   | 0.618   | <b>INF</b>    | 0.792    | 1.792    | <b>2.262</b> |
| ?              | n.d.    | n.d.    | <b>n.d.</b>   | n.d.     | n.d.     | <b>n.d.</b>  |
| TART-element   | n.d.    | n.d.    | <b>n.d.</b>   | n.d.     | n.d.     | <b>n.d.</b>  |
| Penelope/ORF1  | 0.251   | 1.855   | <b>7.396</b>  | n.d.     | n.d.     | <b>n.d.</b>  |
| gtwin          | 0.752   | 3.710   | <b>4.930</b>  | 1110.237 | 2350.081 | <b>2.117</b> |
| TART-element   | n.d.    | n.d.    | <b>n.d.</b>   | n.d.     | n.d.     | <b>n.d.</b>  |
| P-element      | 0.502   | 14.221  | <b>28.350</b> | 0.000    | 8.960    | <b>INF</b>   |

**Table S3. Genetic interactions of *His1* and *Su(var)3-9*.**

**(Top)** Double heterozygous *pINT-H1<sup>2M</sup>/SM5*, *Cy*; *Tub:GAL4/TM3*, *Sb* transgenic fly lines were established and maintained at 18°C. They were mated with homozygous transgenic *UAS:Su(var)3-9-eGFP* or *yw* (control) flies at indicated temperatures. **(Bottom)** Double heterozygous *pINT-H1<sup>2M</sup>/SM5*, *Cy*; *Tub:GAL4/TM3*, *Sb* transgenic flies were mated at 26°C to *yw* (control) flies or indicated mutants. Viability was scored as the number of eclosed *Cy+*, *Sb+* adults relative to the total number of offspring. The expected number of *Cy+*, *Sb+* flies (calculated from the Mendelian distribution) is shown in parentheses. Probability values are calculated by the chi-square two-way test.

| <i>pINT-H1<sup>2M</sup>/SM5</i> ; <i>Tub:GAL4/TM3</i> , <i>Sb</i><br><b>cross with</b> | Temperature |             |            |
|----------------------------------------------------------------------------------------|-------------|-------------|------------|
|                                                                                        | 23°C        | 26°C        | 29°C       |
| <i>UAS:Su(var)3-9-eGFP</i>                                                             | 19/78 (20)  | 25/153 (38) | 5/231 (58) |
| <i>yw</i> (control)                                                                    | 40/256 (64) | 13/192 (48) | 0/147 (37) |
| <i>p</i> -values                                                                       | 0.08        | 0.005       | 0.07       |

| <b>Allele combination</b>                                         | <i>Df(3R)P47/Dp(3;3)C123.3</i> | <i>Su(var)3-9<sup>1</sup>/TM3</i> , <i>Sb</i> | <i>yw</i> (control) |
|-------------------------------------------------------------------|--------------------------------|-----------------------------------------------|---------------------|
| <i>pINT-H1<sup>2M</sup>/SM5</i> ; <i>Tub:GAL4/TM3</i> , <i>Sb</i> | 0/38 (7)                       | 0/61 (10)                                     | 13/192 (48)         |
| <i>p</i> -values                                                  | 0.09                           | 0.04                                          | N/A                 |



## References

1. A. P. Wolffe, *Chromatin: Structure and Function* (Academic Press, San Diego, 1995).
2. S. C. Elgin, S. I. Grewal, Heterochromatin: Silence is golden. *Curr. Biol.* **13**, R895 (2003).
3. J. C. Eissenberg, G. Reuter, Cellular mechanism for targeting heterochromatin formation in *Drosophila*. *Int. Rev. Cell. Mol. Biol.* **273**, 1 (2009).
4. X. Lu *et al.*, Linker histone H1 is essential for *Drosophila* development, the establishment of pericentric heterochromatin, and a normal polytene chromosome structure. *Genes Dev.* **23**, 452 (2009).
5. O. Vujatovic *et al.*, *Drosophila melanogaster* linker histone dH1 is required for transposon silencing and to preserve genome integrity. *Nucleic Acids Res.* **40**, 5402 (2012).
6. J. S. Khurana, W. Theurkauf, piRNAs, transposon silencing, and *Drosophila* germline development. *J. Cell Biol.* **191**, 905 (2010).
7. C. D. Malone, G. J. Hannon, Small RNAs as guardians of the genome. *Cell* **136**, 656 (2009).
8. B. Czech, G. J. Hannon, Small RNA sorting: Matchmaking for Argonautes. *Nat. Rev. Genet.* **12**, 19 (2011).
9. M. Ghildiyal, P. D. Zamore, Small silencing RNAs: An expanding universe. *Nat. Rev. Genet.* **10**, 94 (2009).
10. C. M. Bergman, H. Quesneville, D. Anxolabéhère, M. Ashburner, Recurrent insertion and duplication generate networks of transposable element sequences in the *Drosophila melanogaster* genome. *Genome Biol.* **7**, R112 (2006).
11. P. Dimitri, Constitutive heterochromatin and transposable elements in *Drosophila melanogaster*. *Genetica* **100**, 85 (1997).
12. J. S. Kaminker *et al.*, The transposable elements of the *Drosophila melanogaster* euchromatin: A genomics perspective. *Genome Biol.* **3**, RESEARCH0084 (2002).
13. K. J. Livak, Detailed structure of the *Drosophila melanogaster stellate* genes and their transcripts. *Genetics* **124**, 303 (1990).
14. R. N. Kotelnikov *et al.*, Peculiarities of piRNA-mediated post-transcriptional silencing of *Stellate* repeats in testes of *Drosophila melanogaster*. *Nucleic Acids Res.* **37**, 3254 (2009).
15. A. A. Aravin *et al.*, Double-stranded RNA-mediated silencing of genomic tandem repeats and transposable elements in the *D. melanogaster* germline. *Curr. Biol.* **11**, 1017 (2001).
16. T. Jenuwein, Re-SET-ting heterochromatin by histone methyltransferases. *Trends Cell Biol.* **11**, 266 (2001).
17. S. Daujat, U. Zeissler, T. Waldmann, N. Happel, R. Schneider, HP1 binds specifically to Lys26-methylated histone H1.4, whereas simultaneous Ser27 phosphorylation blocks HP1 binding. *J. Biol. Chem.* **280**, 38090 (2005).
18. A. L. Nielsen *et al.*, Heterochromatin formation in mammalian cells: Interaction between histones and HP1 proteins. *Mol. Cell* **7**, 729 (2001).

19. P. Trojer *et al.*, Dynamic histone H1 isotype 4 methylation and demethylation by histone lysine methyltransferase G9a/KMT1C and the Jumonji domain-containing JMJD2/KDM4 Proteins. *J. Biol. Chem.* **284**, 8395 (2009).
20. A. Ebert, S. Lein, G. Schotta, G. Reuter, Histone modification and the control of heterochromatic gene silencing in *Drosophila*. *Chromosome Res.* **14**, 377 (2006).
21. T. K. Hale, A. Contreras, A. J. Morrison, R. E. Herrera, Phosphorylation of the linker histone H1 by CDK regulates its binding to HP1alpha. *Mol. Cell* **22**, 693 (2006).
22. S. A. Grigoryev, K. S. Spirin, I. A. Krasheninnikov, Loosened nucleosome linker folding in transcriptionally active chromatin of chicken embryo erythrocyte nuclei. *Nucleic Acids Res.* **18**, 7397 (1990).
23. R. T. Kamakaka, J. O. Thomas, Chromatin structure of transcriptionally competent and repressed genes. *EMBO J.* **9**, 3997 (1990).
24. H. Weintraub, Histone-H1-dependent chromatin superstructures and the suppression of gene activity. *Cell* **38**, 17 (1984).
25. X. Lu, S. Liu, T. B. Kornberg, The C-terminal tail of the Hedgehog receptor Patched regulates both localization and turnover. *Genes Dev.* **20**, 2539 (2006).
26. J. C. Clemens *et al.*, Use of double-stranded RNA interference in *Drosophila* cell lines to dissect signal transduction pathways. *Proc. Natl. Acad. Sci. U.S.A.* **97**, 6499 (2000).
27. R. A. Irizarry *et al.*, Summaries of Affymetrix GeneChip probe level data. *Nucleic Acids Res.* **31**, e15 (2003).
28. W. Huang, B. T. Sherman, R. A. Lempicki, Systematic and integrative analysis of large gene lists using DAVID bioinformatics resources. *Nat. Protoc.* **4**, 44 (2009).
29. J. Brennecke *et al.*, Discrete small RNA-generating loci as master regulators of transposon activity in *Drosophila*. *Cell* **128**, 1089 (2007).
30. C. Malone, J. Brennecke, B. Czech, A. Aravin, G. J. Hannon, Preparation of small RNA libraries for high-throughput sequencing. *Cold Spring Harb Protoc* **2012**, 1067 (2012).
31. B. Langmead, C. Trapnell, M. Pop, S. L. Salzberg, Ultrafast and memory-efficient alignment of short DNA sequences to the human genome. *Genome Biol.* **10**, R25 (2009).
32. D. V. Fyodorov, J. T. Kadonaga, Chromatin assembly in vitro with purified recombinant ACF and NAP-1. *Methods Enzymol.* **371**, 499 (2003).
33. R. Eskeland *et al.*, The N-terminus of *Drosophila* SU(VAR)3-9 mediates dimerization and regulates its methyltransferase activity. *Biochemistry* **43**, 3740 (2004).
34. G. E. Croston, P. J. Laybourn, S. M. Paranjape, J. T. Kadonaga, Mechanism of transcriptional antirepression by GAL4-VP16. *Genes Dev.* **6** (12A), 2270 (1992).
35. M. B. Ardehali *et al.*, *Drosophila* Set1 is the major histone H3 lysine 4 trimethyltransferase with role in transcription. *EMBO J.* **30**, 2817 (2011).
